# Supplementary material for: Facile synthesis of carbon nanobranches towards cobalt ion sensing and high-performance micro-supercapacitors
Source: Royal Society of Chemistry journal article supplement (doi:10.1039/c9na00181f), 2019-01-01
Supplement: c9na00181f1.pdf [file c9na00181f1.pdf]

## Supporting Information

### **Facile Synthesis of Carbon Nanobranches towards Cobalt Ion Sensing and High-Performance Micro-Supercapacitors**

*Qiao-Ling Chen, Xingjiang Wu, Hengyang Cheng, Qing Li\* and Su Chen\**

State Key Laboratory of Materials-Oriented Chemical Engineering and College of Chemical Engineering, Nanjing Tech University (former Nanjing University of Technology), Nanjing 210009, P. R. China.

\*Correspondent author: Tel: 86-25-83172258, Fax: 86-25-83172258, E-mail: [chensu@njtech.edu.cn](mailto:chensu@njtech.edu.cn), [liqing1128@njtech.edu.cn](mailto:liqing1128@njtech.edu.cn)

## Supplementary Figures

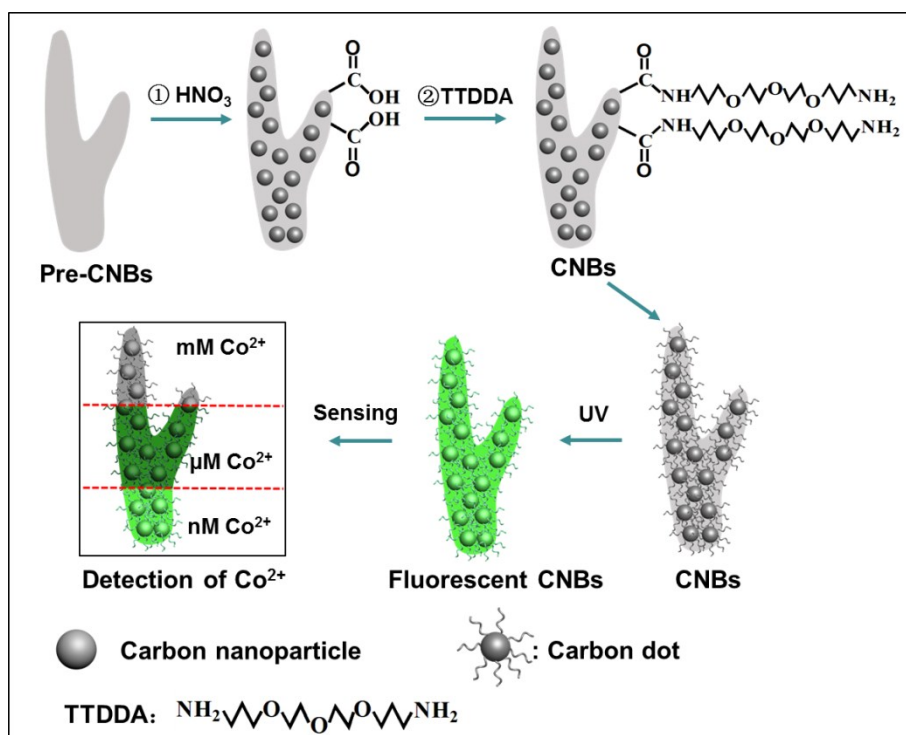

Figure S1. The chemical reaction principle of the two-path modification of CNBs.

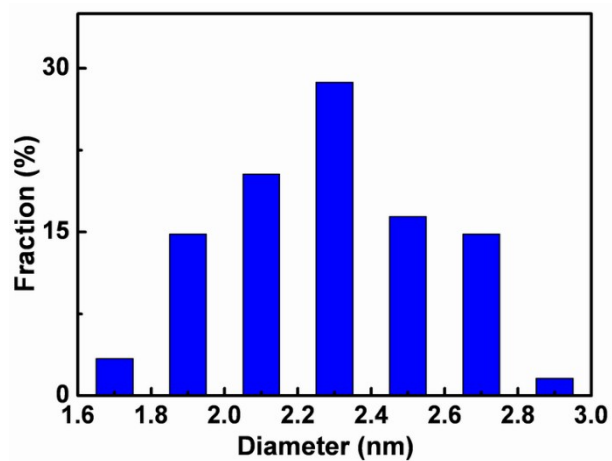

Figure S2. Particle size distribution of CDs.

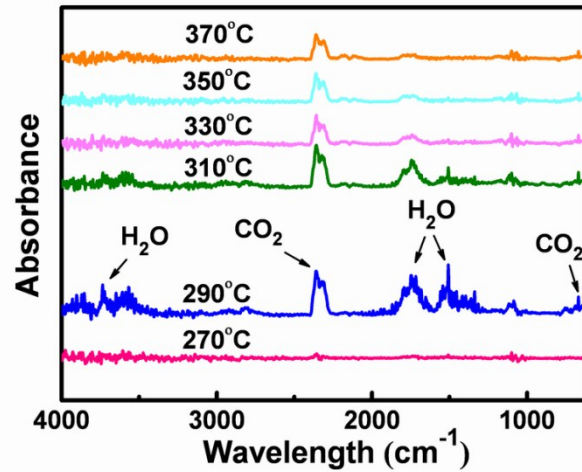

**Figure S3.** Evolutionary FT-IR spectra (270 °C to 370 °C) of gas produced from starch combustion.

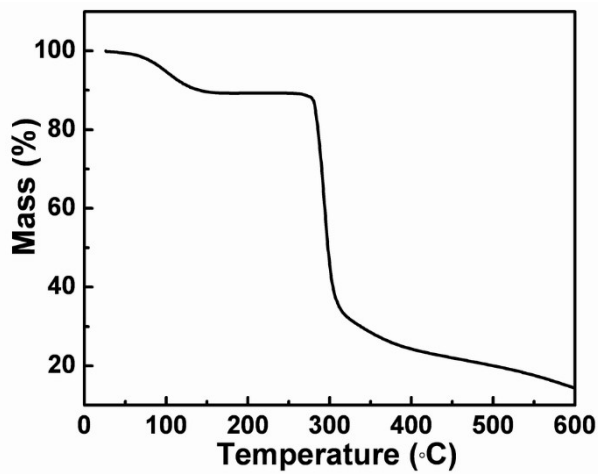

**Figure S4.** TGA curve of starch from 26 °C to 600 °C.

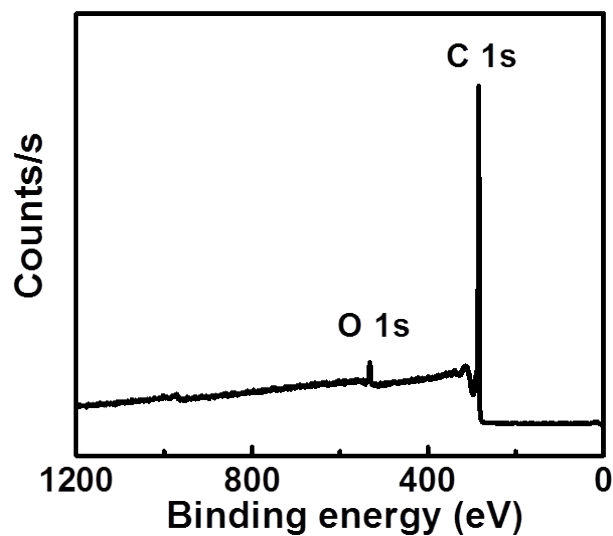

**Figure S5.** XPS spectrum of the CNBs.

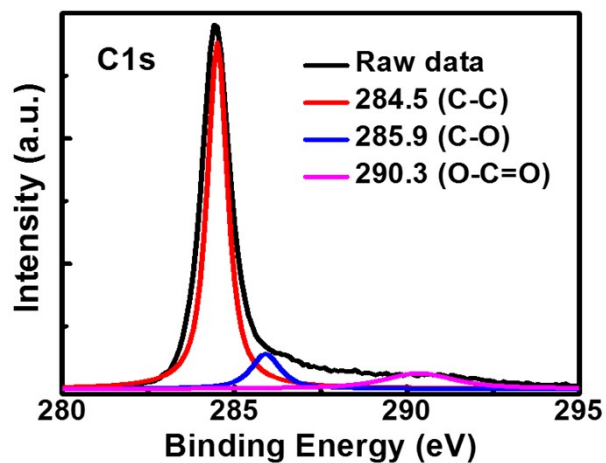

**Figure S6.** High resolution XPS spectrum of C 1s peak of the CNBs.

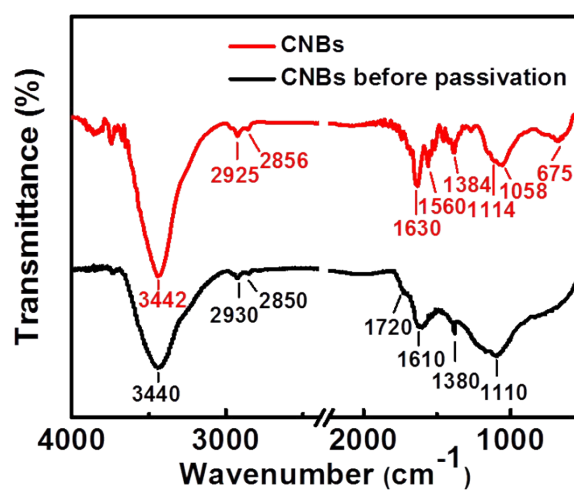

**Figure S7.** FT-IR spectra of CNBs and CNBs before passivation.

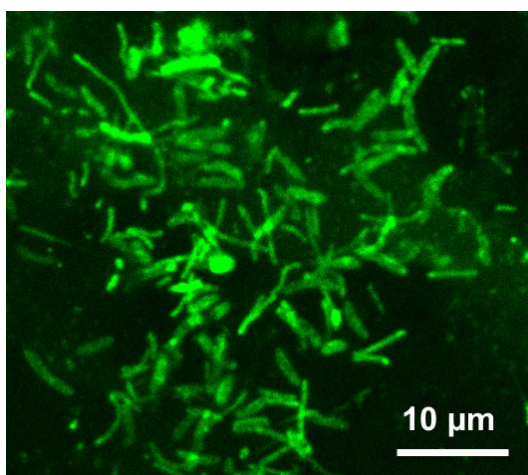

**Figure S8.** Laser confocal fluorescence microscopy (LCFM) image of CNBs at excitation wavelengths of 405 nm.

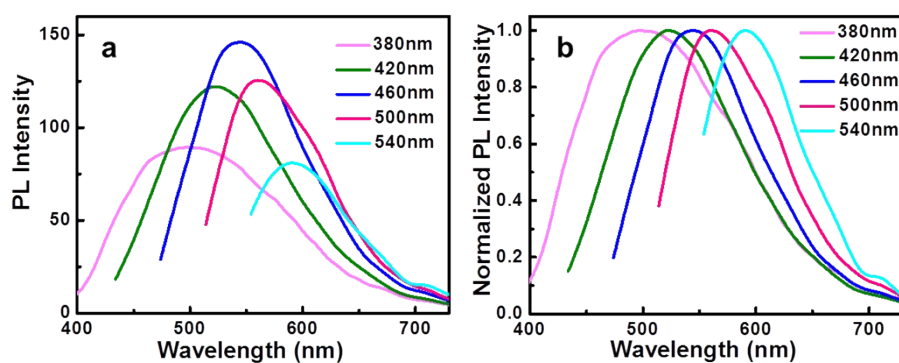

**Figure S9.** (a) PL emission spectra and (b) normalized PL emission spectra of CNBs in aqueous solution at excitation wavelengths starting from 380 nm to 540 nm in 40 nm increments.

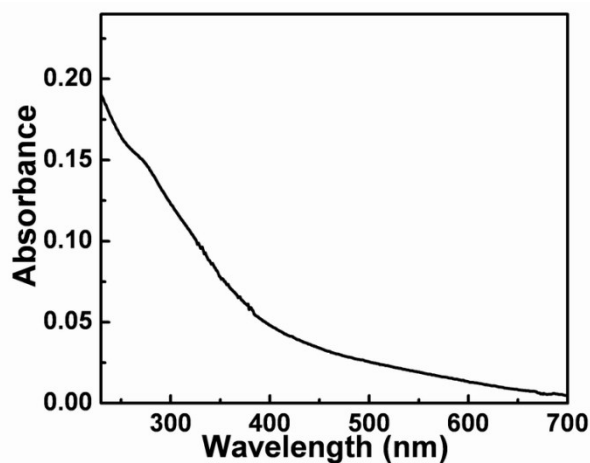

**Figure S10.** UV-vis absorption spectrum of CNBs aqueous solution.

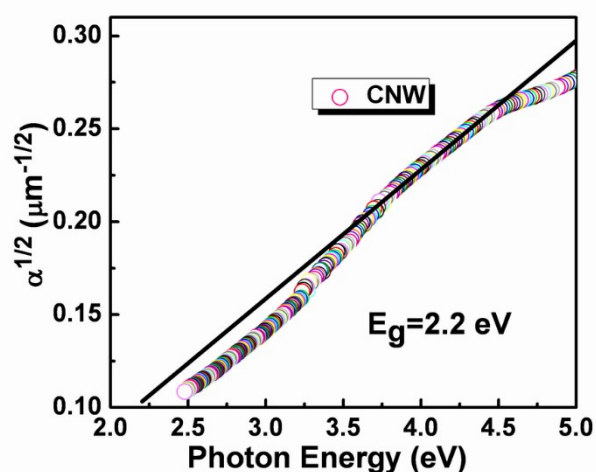

**Figure S11.** Plot of  $\alpha^{1/2}$  vs  $E_{\text{phot}}$  for indirect transitions, where  $\alpha$  is absorption coefficient and  $E_{\text{phot}}$  is photon energy. Band gaps  $E_g$  are obtained by extrapolation to  $\alpha = 0$ .

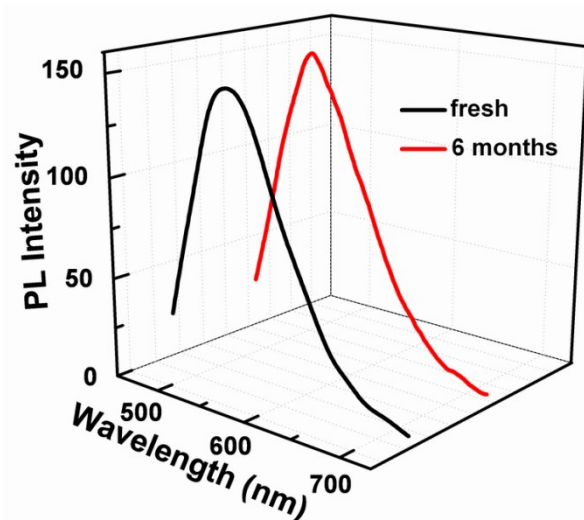

**Figure S12.** PL spectra of fresh and six-month-stored solutions of CNBs ( $\lambda_{\text{ex}} = 460$  nm).

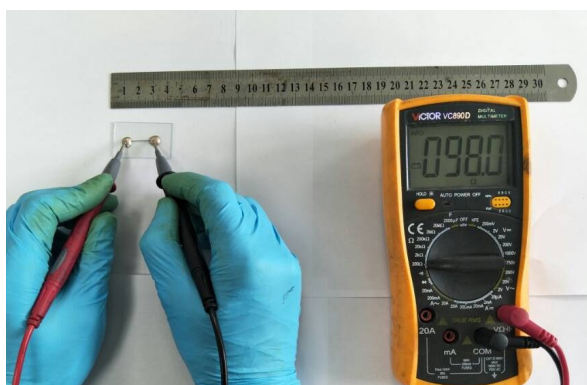

**Figure S13.** The photograph shows the electrical conductivity of a CNBs/TPU fiber.

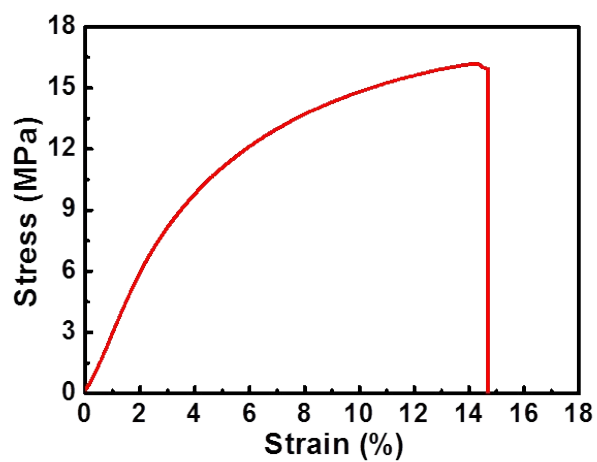

**Figure S14.** Typical stress-strain curve of a CNBs/TPU fiber.

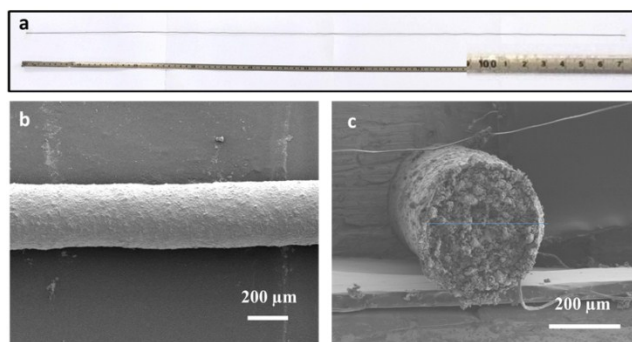

**Figure S15.** (a) Optical photograph of a long CNBs/TPU fiber. SEM images of side (b) and cross-sectional (c) view of a CNBs/TPU fiber.

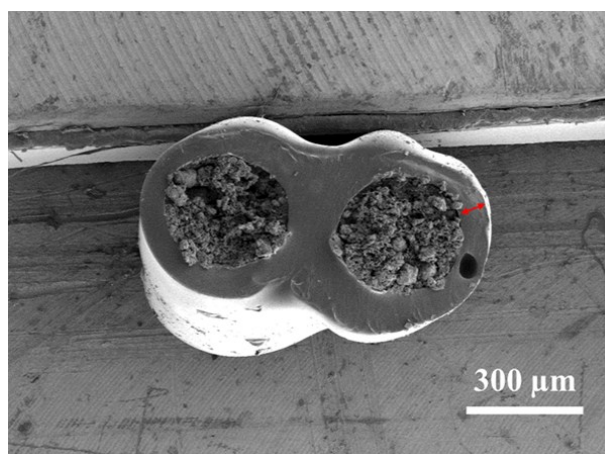

**Figure S16.** SEM image of cross-sectional view of a CNBs/TPU fiber-based micro-SCs. Red arrow area is H<sub>3</sub>PO<sub>4</sub>/PVA gel electrolyte.

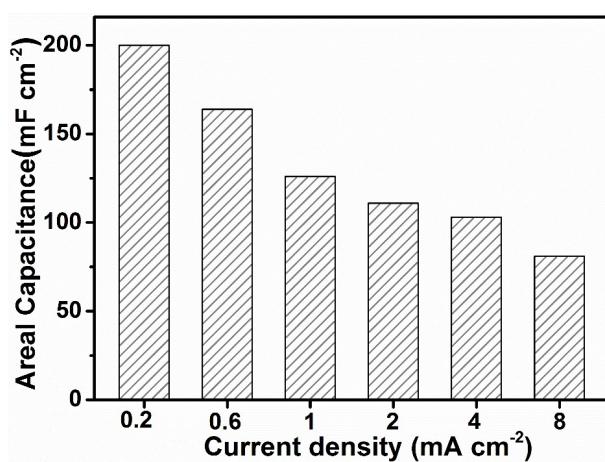

**Figure S17.** The calculated specific capacitances under different current densities.

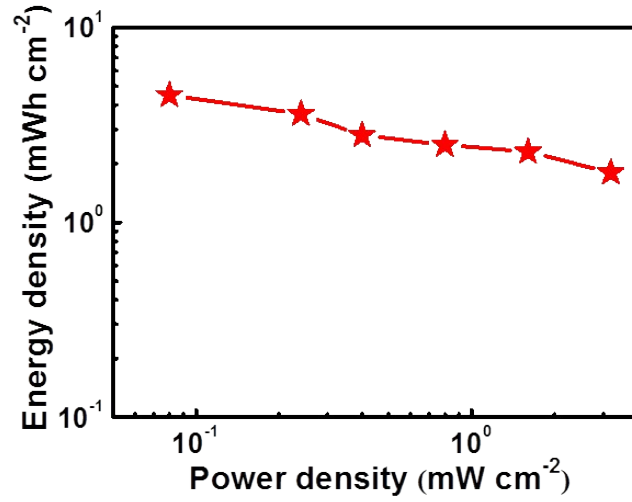

**Figure S18.** Corresponding energy density and power density of the CNBs/TPU fiber-based micro-SCs.

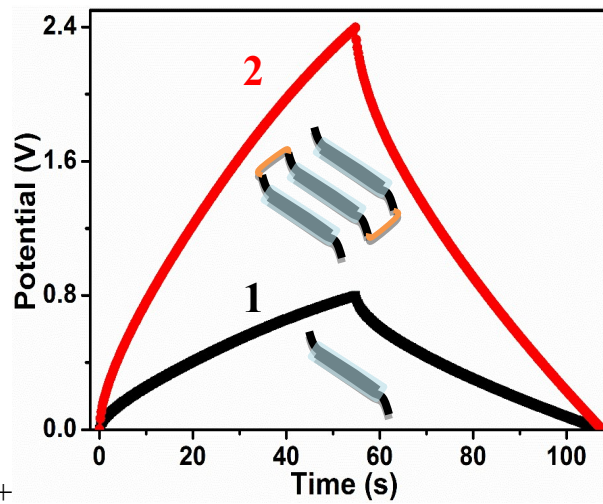

**Figure S19.** Three micro-SCs connected in series.

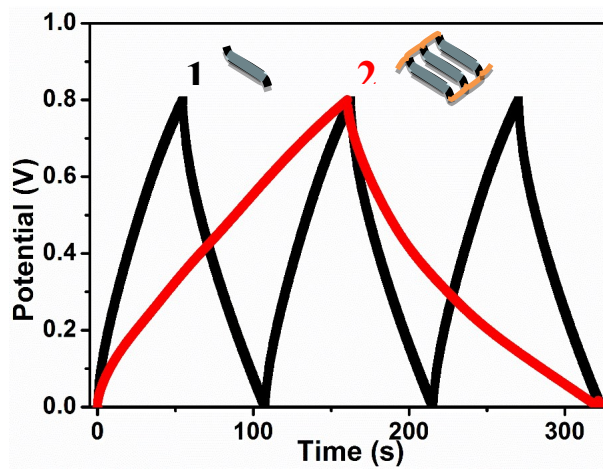

**Figure S20.** Three micro-SCs connected in parallel.
